# Supplementary material for: An atom in molecules study of infrared intensity enhancements in fundamental donor stretching bands in hydrogen bond formation
Source: Royal Society of Chemistry journal article supplement (doi:10.1039/c4cp03489a), 2014-01-01
Supplement: c4cp03489a1.pdf [file c4cp03489a1.pdf]

**Supplementary material: An atom in molecules study of infrared intensity enhancements  
in fundamental donor stretching bands on hydrogen bond formation.**

Luiz A. Terrabuio, Wagner E. Richter, Arnaldo F. da Silva Filho, Roy E. Bruns, Roberto L.A.

Haiduke\*

\* haiduke@iqsc.usp.br

Table S1: Bond lengths (Å) and angles (°).

| System                | distance/angle                    | CCSD/aug-cc-pVTZ | CCSD/cc-pVQZ-mod | Exp.                     |
|-----------------------|-----------------------------------|------------------|------------------|--------------------------|
| HF                    | r(HF)                             | 0.918            | 0.914            | 0.917 <sup>a</sup>       |
| HCl                   | r(HCl)                            | 1.276            | 1.273            | 1.275 <sup>a</sup>       |
| HCN                   | r(HC)                             | 1.065            | 1.064            | 1.066 <sup>a</sup>       |
|                       | r(CN)                             | 1.153            | 1.149            | 1.153 <sup>a</sup>       |
| HNC                   | r(HN)                             | 0.995            | 0.993            | 0.996 <sup>b</sup>       |
|                       | r(NC)                             | 1.168            | 1.165            | 1.168 <sup>b</sup>       |
| H <sub>2</sub> O      | r(HO)                             | 0.959            | 0.955            | 0.958 <sup>a</sup>       |
|                       | ∠(HOH)                            | 104.4            | 104.4            | 104.5 <sup>a</sup>       |
| HF...HF               | r(HF) <sub>donor</sub>            | 0.923            | 0.918            |                          |
|                       | r(HF) <sub>acceptor</sub>         | 0.920            | 0.916            |                          |
|                       | r(F...H)                          | 1.842            | 1.841            |                          |
|                       | r(F...F)                          | 2.75             | 2.75             | 2.72 ± 0.03 <sup>c</sup> |
|                       | ∠(H-F <sub>donor</sub> ...F)      | 7                | 7                | 10 ± 6 <sup>c</sup>      |
|                       | ∠(H-F <sub>acceptor</sub> ...F)   | 111              | 111              | 117 ± 6 <sup>c</sup>     |
| HCl...HCl             | r(HCl) <sub>donor</sub>           | 1.279            | 1.276            |                          |
|                       | r(HCl) <sub>acceptor</sub>        | 1.278            | 1.275            |                          |
|                       | r(Cl...H)                         | 2.588            | 2.636            |                          |
|                       | r(Cl...Cl)                        | 3.848            | 3.892            | 3.746 <sup>d</sup>       |
|                       | ∠(H-Cl <sub>donor</sub> ...Cl)    | 8                | 8                | 9 <sup>d</sup>           |
|                       | ∠(H-Cl <sub>acceptor</sub> ...Cl) | 88.2             | 88.4             | 90.2 <sup>d</sup>        |
| HCN...HCN             | r(HC) <sub>donor</sub>            | 1.070            | 1.070            | 1.246 <sup>e</sup>       |
|                       | r(CN) <sub>donor</sub>            | 1.153            | 1.150            | 1.140 <sup>e</sup>       |
|                       | r(HC) <sub>acceptor</sub>         | 1.066            | 1.065            | 1.063 <sup>e</sup>       |
|                       | r(CN) <sub>acceptor</sub>         | 1.151            | 1.148            | 1.123 <sup>e</sup>       |
|                       | r(N...H)                          | 2.255            | 2.240            | 2.075 <sup>e</sup>       |
|                       | r(N...N)                          | 4.488            | 4.460            | 4.461 <sup>e</sup>       |
| HNC...HNC             | r(HN) <sub>donor</sub>            | 1.008            | 1.006            |                          |
|                       | r(NC) <sub>donor</sub>            | 1.167            | 1.164            |                          |
|                       | r(HN) <sub>acceptor</sub>         | 0.996            | 0.995            |                          |
|                       | r(NC) <sub>acceptor</sub>         | 1.163            | 1.160            |                          |
|                       | r(C...H)                          | 2.111            | 2.120            |                          |
| HCN...HF              | r(HF) <sub>donor</sub>            | 0.929            | 0.923            |                          |
|                       | r(HC) <sub>acceptor</sub>         | 1.066            | 1.065            |                          |
|                       | r(CN) <sub>acceptor</sub>         | 1.149            | 1.146            |                          |
|                       | r(N...H)                          | 1.868            | 1.883            |                          |
|                       | r(N...F)                          | 2.796            | 2.806            | 2.796 <sup>f</sup>       |
| HF...HCl              | r(HCl) <sub>donor</sub>           | 1.280            | 1.277            |                          |
|                       | r(HF) <sub>acceptor</sub>         | 0.920            | 0.915            |                          |
|                       | r(F...H)                          | 2.096            | 2.097            | 2.12 <sup>g</sup>        |
|                       | r(Cl...F)                         | 3.37             | 3.36             | 3.37 <sup>g</sup>        |
|                       | ∠(H-Cl <sub>donor</sub> ...F)     | 6                | 7                |                          |
|                       | ∠(H-F <sub>acceptor</sub> ...Cl)  | 117              | 115              | 130 <sup>g</sup>         |
| H <sub>2</sub> O...HF | r(HF) <sub>donor</sub>            | 0.930            | 0.926            |                          |
|                       | r(OH) <sub>acceptor</sub>         | 0.958            | 0.954            |                          |
|                       | r(O...H)                          | 1.741            | 1.741            |                          |
|                       | r(O...F)                          | 2.67             | 2.65             | 2.662 <sup>h</sup>       |
|                       | ∠(H-F <sub>donor</sub> ...O)      | 0.4              | 0.5              |                          |

<sup>a</sup> Haynes, W.M., Ed., CRC Handbook of Chemistry and Physics; 93rd Ed. (Internet Version 2013); CRC Press/Taylor and Francis, Boca Raton, FL.

<sup>b</sup> Okabayashi, T.; Tanimoto, M. Millimeter and Submillimeter-Wave Spectroscopy of HNC and DNC in the Vibrationally Excited States. *J. Chem. Phys.* **1993**, *99*, 3268-3271.

<sup>c</sup> Howard, B.J.; Dyke, T.R.; Klemperer, W. The Molecular-Beam Spectrum and the Structure of the Hydrogen-Fluoride Dimer. *J. Chem. Phys.* **1984**, *81*, 5417-5425.

<sup>d</sup> Semiempirical values from Elrod, M.J.; Saykally, R.J. Determination of the Intermolecular Potential-Energy Surface for (HCl)<sub>2</sub> from Vibration-Rotation-Tunneling Spectra. *J. Chem. Phys.* **1995**, *103*, 933-949.

<sup>e</sup> Ruoff, R.S.; Emilsson, T.; Chuang, C.; Klots, T.D.; Gutowsky, H.S. Experimental Separation of Torsional and Charge Redistribution Effects in Rotational Spectra of HCN Dimers. *Chem. Phys. Letters* **1987**, *138*, 553-558.

<sup>f</sup> Legon, A.C.; Millen, D.J.; Rogers, S.C. Dipole-Moment Enhancement on Formation of a Hydrogen-Bonded Complex - Demonstration and Measurement of Effect for HCN...HF by Microwave Spectroscopy. *Chem. Phys. Letters* **1976**, *41*, 137-138.

<sup>g</sup> Janda, K.C.; Steed, J.M.; Novick, S.E.; Klemperer, W. Hydrogen-Bonding - Structure of HF-HCl. *J. Chem. Phys.* **1977**, *67*, 5162-5172.

<sup>h</sup> Bevan, J.W.; Kisiel, Z.; Legon, A.C.; Millen, D.J.; Rogers, S.C. Spectroscopic Investigations of Hydrogen-Bonding Interactions in the Gas-Phase.4. The Heterodimer H<sub>2</sub>O...HF - The Observation and Analysis of Its Microwave Rotational Spectrum and the Determination of Its Molecular-Geometry and Electric-Dipole Moment. *Proc. R. Soc. Lond. A* **1980**, *372*, 441-451.

The largest deviations in bond lengths (roughly 0.2 Å) are observed for two values of the HCN...HCN dimer but, as discussed in the experimental data source,<sup>e</sup> they can be explained by inaccuracies in microwave derived distances since the hydrogen from the donor molecule is very close to the center of mass.

Table S2: QTAIM charges obtained from CCSD/cc-pVQZ-mod calculations at equilibrium geometries.

| System           | Atom <sup>a</sup> | q <sub>i</sub> (e) | System                | Atom <sup>a</sup> | q <sub>i</sub> (e) |
|------------------|-------------------|--------------------|-----------------------|-------------------|--------------------|
| HF               | H                 | 0.753              | HNC...HNC             | H <sub>d</sub>    | 0.585              |
| HCl              | H                 | 0.256              |                       | N <sub>d</sub>    | -1.615             |
| HCN              | H                 | 0.191              |                       | C <sub>d</sub>    | 1.000              |
|                  | C                 | 1.015              |                       | H <sub>a</sub>    | 0.566              |
|                  | N                 | -1.207             |                       | N <sub>a</sub>    | -1.556             |
| HNC              | H                 | 0.551              |                       | C <sub>a</sub>    | 1.020              |
|                  | N                 | -1.581             | HCN...HF              | H <sub>d</sub>    | 0.774              |
|                  | C                 | 1.030              |                       | F <sub>d</sub>    | -0.801             |
| H <sub>2</sub> O | H                 | 0.588              |                       | H <sub>a</sub>    | 0.214              |
|                  | O                 | -1.176             |                       | C <sub>a</sub>    | 1.059              |
| HF...HF          | H <sub>d</sub>    | 0.774              |                       | N <sub>a</sub>    | -1.247             |
|                  | F <sub>d</sub>    | -0.785             | HF...HCl              | H <sub>d</sub>    | 0.299              |
|                  | H <sub>a</sub>    | 0.770              |                       | Cl <sub>d</sub>   | -0.303             |
|                  | F <sub>a</sub>    | -0.759             |                       | H <sub>a</sub>    | 0.764              |
| HCl...HCl        | H <sub>d</sub>    | 0.274              |                       | F <sub>a</sub>    | -0.761             |
|                  | Cl <sub>d</sub>   | -0.285             | H <sub>2</sub> O...HF | H <sub>d</sub>    | 0.782              |
|                  | H <sub>a</sub>    | 0.267              |                       | F <sub>d</sub>    | -0.806             |
|                  | Cl <sub>a</sub>   | -0.256             |                       | H <sub>a</sub>    | 0.616              |
| HCN...HCN        | H <sub>d</sub>    | 0.247              |                       | O <sub>a</sub>    | -1.207             |
|                  | C <sub>d</sub>    | 0.984              |                       |                   |                    |
|                  | N <sub>d</sub>    | -1.242             |                       |                   |                    |
|                  | H <sub>a</sub>    | 0.208              |                       |                   |                    |
|                  | C <sub>a</sub>    | 1.043              |                       |                   |                    |
|                  | N <sub>a</sub>    | -1.240             |                       |                   |                    |

<sup>a</sup> The letters “a” and “d” refer to acceptor and donor monomers, respectively.

Table S3: Ratio between square roots of fundamental infrared intensities of  $\text{HX}_{\text{donor}}$  stretching modes in dimers (D) and monomers (M) along with the equivalent ratio from  $p_{zz}^H$  elements of donor monomers as obtained from CCSD/cc-pVQZ-mod calculations.

| Dimers                | $\sqrt{A^D/A^M}$ | $p_{zz}^D/p_{zz}^M$ |
|-----------------------|------------------|---------------------|
| HF...HF               | 1.97             | 1.90                |
| HCl...HCl             | 2.14             | 2.14                |
| HCN...HCN             | 2.17             | 2.28                |
| HNC...HNC             | 2.12             | 2.31                |
| HCN...HF              | 2.66             | 2.69                |
| HF...HCl              | 2.21             | 2.20                |
| H <sub>2</sub> O...HF | 2.55             | 2.63                |

Table S4: Variations in QTAIM/CCFDF contributions to the infrared intensities of X-H stretching modes ( $\text{km mol}^{-1}$ ) due to dimerization according only to  $p_{zz}^H$  elements of donor monomers as obtained from CCSD/cc-pVQZ-mod calculations.

| Dimers                |                      | QTAIM/CCFDF <sup>a</sup> |                  |                  |                           |                           |                            |                                | Tot   |
|-----------------------|----------------------|--------------------------|------------------|------------------|---------------------------|---------------------------|----------------------------|--------------------------------|-------|
| Y...HX                | Attrib.              | $\Delta(A^C)$            | $\Delta(A^{CF})$ | $\Delta(A^{DF})$ | $\Delta(A^{C \times CF})$ | $\Delta(A^{C \times DF})$ | $\Delta(A^{CF \times DF})$ | $\Delta(A^{CF \text{ terms}})$ |       |
| HF...HF               | HF <sub>donor</sub>  | 31.2                     | -248.0           | 30.7             | 301.3                     | 92.4                      | 62.7                       | 116.1                          | 270.4 |
| HCl...HCl             | HCl <sub>donor</sub> | 9.3                      | 127.9            | -59.8            | 86.3                      | 19.4                      | -52.9                      | 161.4                          | 130.2 |
| HCN...HCN             | HC <sub>donor</sub>  | 24.0                     | 450.9            | 31.0             | 210.9                     | -79.2                     | -387.5                     | 274.3                          | 250.2 |
| HNC...HNC             | HN <sub>donor</sub>  | 37.8                     | 353.5            | -2.0             | 603.7                     | -8.2                      | -206.4                     | 750.9                          | 778.6 |
| HCN...HF              | HF <sub>donor</sub>  | 31.9                     | -446.3           | -10.2            | 800.2                     | -20.0                     | 288.9                      | 642.8                          | 644.5 |
| HF...HCl              | HCl <sub>donor</sub> | 23.2                     | 114.0            | -57.8            | 105.9                     | -2.4                      | -45.0                      | 174.9                          | 137.9 |
| H <sub>2</sub> O...HF | HF <sub>donor</sub>  | 44.0                     | -401.9           | 39.6             | 623.5                     | 118.8                     | 190.2                      | 411.8                          | 614.2 |

<sup>a</sup>  $\Delta(A^i) = A^i(\text{dimer}) - A^i(\text{monomer})$ .

Table S5: Atomic terms of the QTAIM/CCFDF analysis of the polar tensor elements ( $e$ ) associated with parallel dipole moment derivatives for displacements of the bridge hydrogen along the X-H axis from CCSD/cc-pVQZ-mod calculations.<sup>a</sup>

| Monomer               | $q_{\text{Hd}}$ | $-R_{\text{XHd}} \frac{\partial q_X}{\partial z_{\text{Hd}}}$ | $R_{\text{YHd}} \frac{\partial q_Y}{\partial z_{\text{Hd}}}$ | $\frac{\partial m_{\text{Hd},z}}{\partial z_{\text{Hd}}}$ | $\frac{\partial m_{X,z}}{\partial z_{\text{Hd}}}$ | $\frac{\partial m_{Y,z}}{\partial z_{\text{Hd}}}$ | Other atoms |        | Tot   |
|-----------------------|-----------------|---------------------------------------------------------------|--------------------------------------------------------------|-----------------------------------------------------------|---------------------------------------------------|---------------------------------------------------|-------------|--------|-------|
|                       |                 |                                                               |                                                              |                                                           |                                                   |                                                   | CF          | DF     |       |
| HF                    | 0.753           | -0.691                                                        | -                                                            | -0.074                                                    | 0.338                                             | -                                                 | -           | -      | 0.326 |
| HCl                   | 0.256           | 0.423                                                         | -                                                            | 0.077                                                     | -0.562                                            | -                                                 | -           | -      | 0.194 |
| HCN                   | 0.191           | 0.536                                                         | -                                                            | 0.075                                                     | -0.656                                            | -                                                 | 0.130       | -0.029 | 0.247 |
| HNC                   | 0.551           | -0.127                                                        | -                                                            | 0.066                                                     | -0.258                                            | -                                                 | 0.211       | -0.015 | 0.427 |
| Dimer                 | $q_{\text{Hd}}$ | $-R_{\text{XHd}} \frac{\partial q_X}{\partial z_{\text{Hd}}}$ | $R_{\text{YHd}} \frac{\partial q_Y}{\partial z_{\text{Hd}}}$ | $\frac{\partial m_{\text{Hd},z}}{\partial z_{\text{Hd}}}$ | $\frac{\partial m_{X,z}}{\partial z_{\text{Hd}}}$ | $\frac{\partial m_{Y,z}}{\partial z_{\text{Hd}}}$ | CF          | DF     | Tot   |
| HF...HF               | 0.774           | -0.534                                                        | -0.018                                                       | -0.015                                                    | 0.283                                             | 0.049                                             | 0.079       | 0.002  | 0.619 |
| HCl...HCl             | 0.274           | 0.486                                                         | 0.023                                                        | 0.102                                                     | -0.556                                            | 0.037                                             | 0.048       | -0.001 | 0.414 |
| HCN...HCN             | 0.247           | 0.559                                                         | -0.066                                                       | 0.110                                                     | -0.696                                            | -0.008                                            | 0.459       | -0.042 | 0.564 |
| HNC...HNC             | 0.585           | -0.020                                                        | 0.007                                                        | 0.092                                                     | -0.292                                            | -0.015                                            | 0.621       | 0.013  | 0.991 |
| HCN...HF              | 0.774           | -0.473                                                        | -0.072                                                       | -0.012                                                    | 0.282                                             | -0.009                                            | 0.403       | -0.017 | 0.876 |
| HF...HCl              | 0.299           | 0.517                                                         | -0.027                                                       | 0.119                                                     | -0.566                                            | 0.025                                             | 0.054       | 0.002  | 0.423 |
| H <sub>2</sub> O...HF | 0.782           | -0.444                                                        | -0.059                                                       | 0.005                                                     | 0.275                                             | 0.035                                             | 0.247       | 0.018  | 0.858 |

<sup>a</sup> The letter “d” labelling some of the terms refers to donor monomers.

Table S6: Contributions from charge, charge flux (donor, charge transfer and acceptor) and polarization changes (donor and acceptor) as given by the QTAIM/CCDFD analysis of the polar tensor elements ( $e$ ) associated with parallel dipole moment derivatives for displacements of the bridge hydrogen along the X-H axis from CCSD/cc-pVQZ-mod calculations.<sup>a</sup>

| Monomer               | $q_{Hd}$ | $\sum_{i \in d} z_{iHd} \frac{\partial q_i}{\partial z_{Hd}}$ | $\sum_{i \in a} z_{YHd} \frac{\partial q_i}{\partial z_{Hd}}$ | $\sum_{i \in a} z_{iY} \frac{\partial q_i}{\partial z_{Hd}}$ | $\sum_{i \in d} \frac{\partial m_{i,z}}{\partial z_{Hd}}$ | $\sum_{i \in a} \frac{\partial m_{i,z}}{\partial z_{Hd}}$ | Tot   |
|-----------------------|----------|---------------------------------------------------------------|---------------------------------------------------------------|--------------------------------------------------------------|-----------------------------------------------------------|-----------------------------------------------------------|-------|
| HF                    | 0.753    | -0.691                                                        | -                                                             | -                                                            | 0.264                                                     | -                                                         | 0.326 |
| HCl                   | 0.256    | 0.423                                                         | -                                                             | -                                                            | -0.485                                                    | -                                                         | 0.194 |
| HCN                   | 0.191    | 0.666                                                         | -                                                             | -                                                            | -0.610                                                    | -                                                         | 0.247 |
| HNC                   | 0.551    | 0.084                                                         | -                                                             | -                                                            | -0.208                                                    | -                                                         | 0.427 |
| Dimer                 | $q_{Hd}$ | $\sum_{i \in d} z_{iHd} \frac{\partial q_i}{\partial z_{Hd}}$ | $\sum_{i \in a} z_{YHd} \frac{\partial q_i}{\partial z_{Hd}}$ | $\sum_{i \in a} z_{iY} \frac{\partial q_i}{\partial z_{Hd}}$ | $\sum_{i \in d} \frac{\partial m_{i,z}}{\partial z_{Hd}}$ | $\sum_{i \in a} \frac{\partial m_{i,z}}{\partial z_{Hd}}$ | Tot   |
| HF...HF               | 0.774    | -0.534                                                        | 0.053                                                         | 0.008                                                        | 0.268                                                     | 0.051                                                     | 0.619 |
| HCl...HCl             | 0.274    | 0.486                                                         | 0.076                                                         | -0.005                                                       | -0.454                                                    | 0.036                                                     | 0.414 |
| HCN...HCN             | 0.247    | 0.794                                                         | 0.066                                                         | 0.092                                                        | -0.620                                                    | -0.015                                                    | 0.564 |
| HNC...HNC             | 0.585    | 0.289                                                         | 0.191                                                         | 0.128                                                        | -0.185                                                    | -0.017                                                    | 0.991 |
| HCN...HF              | 0.774    | -0.473                                                        | 0.148                                                         | 0.183                                                        | 0.270                                                     | -0.026                                                    | 0.876 |
| HF...HCl              | 0.299    | 0.517                                                         | 0.020                                                         | 0.007                                                        | -0.447                                                    | 0.027                                                     | 0.423 |
| H <sub>2</sub> O...HF | 0.782    | -0.444                                                        | 0.127                                                         | 0.061                                                        | 0.280                                                     | 0.053                                                     | 0.858 |

<sup>a</sup> The letters "a" and "d" labelling some of the terms refer to acceptor and donor monomers, respectively.
